# Supplementary material for: Aqueous electrolyte-gated ZnO transistors for environmental and biological sensing
Source: Royal Society of Chemistry journal article supplement (doi:10.1039/c4tc02075h), 2014-01-01
Supplement: c4tc02075h1.pdf [file c4tc02075h1.pdf]

## Electronic Supplementary Information

### **Electrolyte-gated nanostructured ZnO transistors for environmental and biological sensing**

E. Bandiello, M. Sessolo\* and H. J. Bolink

Instituto de Ciencia Molecular (ICMOL), Universidad de Valencia, 46980 Paterna, Valencia, Spain

\*To whom all correspondence should be addressed: Email: michele.sessolo@uv.es

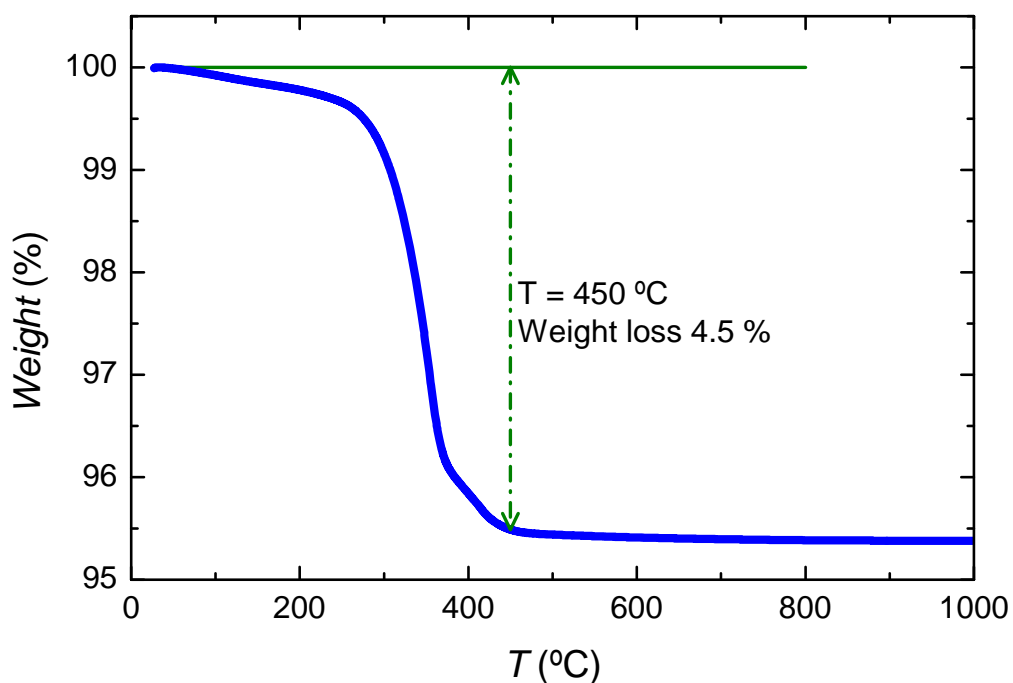

**Figure S1.** Thermogravimetric analysis of a dry sample of the ZnO nanoparticles used as the semiconducting channel (dispersions were obtained from Sigma Aldrich) in electrolyte-gated transistors. At the annealing temperature used for device preparation (450 °C), the weight loss is

about 4.5 % and no substantial mass change is observed when further increasing the temperature to 1000 °C.

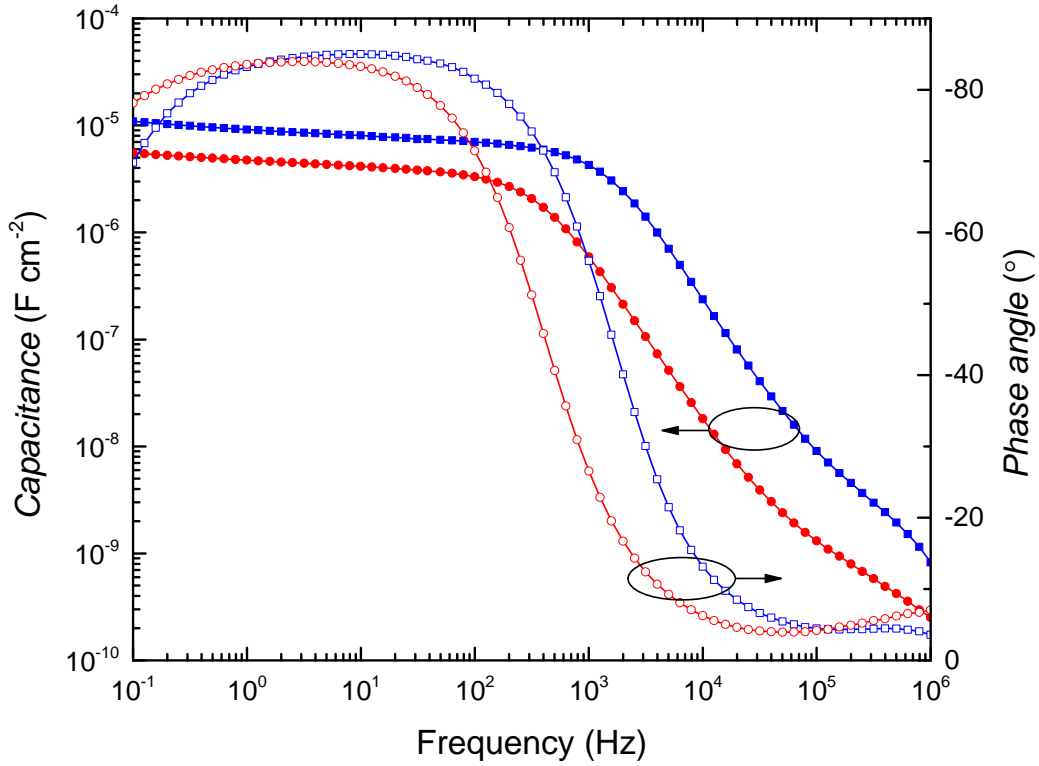

**Figure S2.** Capacitance (*full squares*) and phase angle (*open squares*) of a nanostructured ZnO films deposited onto an ITO electrode and measured in the three electrode configuration. The specific capacitance was extracted at the minimum of the phase angle (capacitive regime,  $-85.1^{\circ}$  at 10 Hz) and scaled to the electrode area ( $4.46\ mm^2$ ). The capacitance and the phase angle for a flat ZnO layer, deposited by a sol-gel method, are also reported (*full and open circles*). At 10 Hz, the capacitance of the nanostructured ZnO is  $\sim 1.9\times$  that of the flat film, confirming the increment of the surface area.

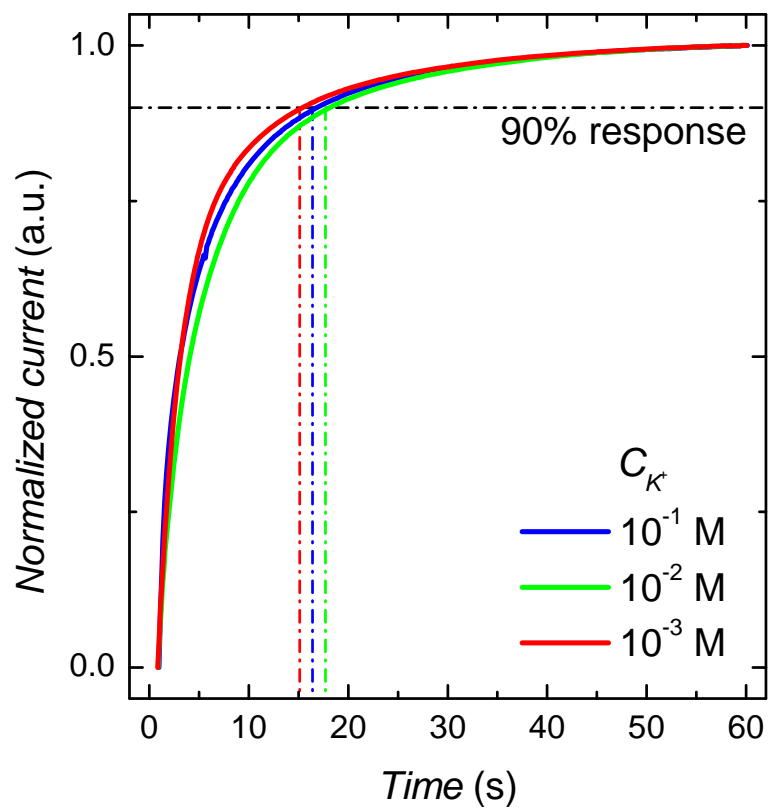

**Figure S3.** Normalized current response of the ion-selective electrolyte-gated transistor (IS-EGT) to different concentrations of potassium in water ( $C_{K^+}$ ). The time to reach 90% of the equilibrium current ( $t_{90}$ ) is highlighted for the three different concentrations.

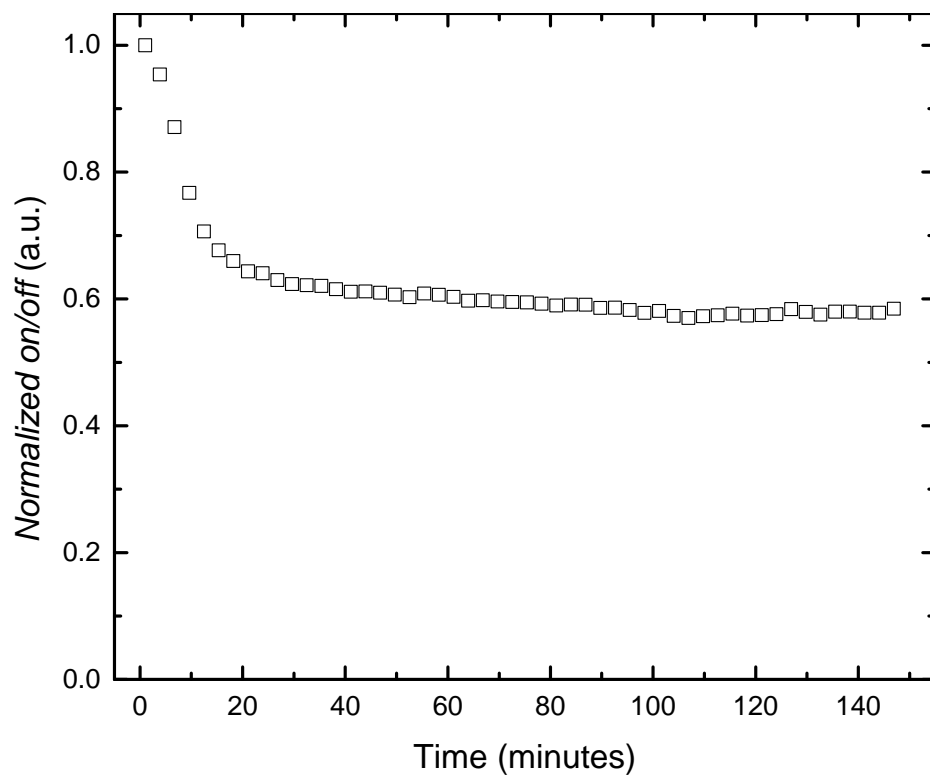

**Figure S4.** Normalized *on/off* ratio vs. time for the water-gated ZnO EGT. For this test, the transistor has been driven at  $V_d=0.4$  V, while switching the gate bias between  $V_g=0$  V (*off*) and  $V_g=0.9$  V (*maximum transconductance*) with a period of 180 s. After 2.5 h, the *on/off* ratio is still at about 60% of its maximum value.
